# Supplementary material for: Relationship between nutritional adequacy and anthropometric profile characteristics according to playing position in professional female soccer players: A cross-sectional study
Source: Research Square preprint supplement (doi:10.21203/rs.3.rs-8291239/v1), 2025-12-31
Supplement: Supplementary file 1 [file 83e7992b1c79d73f6f3e528b.docx]

**Additional file 1. Relation between nutritional adequacy and body composition components stratified by playing position.**

| **Nutritional Adequacy** | **Anthropometric Component** | **Forwards (n=12)** | | **Midfielders (n=11)** | | **Defenders (n=16)** | | **Goalkeepers (n=4)** | |
| --- | --- | --- | --- | --- | --- | --- | --- | --- | --- |
| ***p*** | **tau** | ***p*** | **tau** | ***p*** | **tau** | ***p*** | **tau** |
| **ENERGY** | **Adipose Mass** | .788 | .18ᵃ | .338 | -.29ᵃ | .790 | -.07ᵃ | N/A | N/A |
| **Muscle Mass** | .209 | -.53ᵇ | .382 | -.17ᵇ | .159 | -.47ᵇ | .146 | -1.00ᵃ |
| **Bone Mass** | .221 | -.33ᵇ | .338 | -.29ᵃ | .551 | -.15ᵃ | N/A | N/A |
| **Residual Mass** | N/A | N/A | N/A | N/A | .330 | -.24ᵃ | N/A | N/A |
| **Skin Mass** | .513 | -.28ᵇ | **.**126 | -.67ᵃ | .182 | .33ᵃ | N/A | N/A |
| **PROTEINS** | **Adipose Mass** | .235 | -.47ᵇ | .338 | -.29ᵃ | .051 | -.49ᵃ | N/A | N/A |
| **Muscle Mass** | .060 | -.69ᵇ | .382 | -.17ᵇ | .411 | -.16ᵇ | N/A | N/A |
| **Bone Mass** | .083 | -.50ᵃ | .338 | -.29ᵃ | .383 | -.22ᵃ | N/A | N/A |
| **Residual Mass** | N/A | N/A | N/A | N/A | .541 | -.15ᵃ | N/A | N/A |
| **Skin Mass** | .325 | -.39ᵇ | .126 | -.67ᵃ | .696 | .10ᵃ | N/A | N/A |
| **CARBOHYDRATES** | **Adipose Mass** | .424 | .17ᵇ | N/A | N/A | .182 | -.33ᵃ | N/A | N/A |
| **Muscle Mass** | .915 | -.06ᵇ | N/A | N/A | .660 | -.08ᵇ | .248 | -.58ᵃ |
| **Bone Mass** | .157 | -.33ᵇ | N/A | N/A | .551 | -.15ᵃ | N/A | N/A |
| **Residual Mass** | N/A | N/A | N/A | N/A | .486 | .17ᵃ | N/A | N/A |
| **Skin Mass** | .368 | .17ᵇ | N/A | N/A | .790 | .07ᵃ | N/A | N/A |
| **LIPIDS** | **Adipose Mass** | .221 | .08ᵇ | .280 | -.46ᵇ | .869 | -.03ᵇ | N/A | N/A |
| **Muscle Mass** | .078 | -.58ᵇ | .318 | -.17ᵇ | .146 | -.58ᵃ | N/A | N/A |
| **Bone Mass** | .325 | -.28ᵇ | .073 | -.33ᵇ | .712 | -.09ᵃ | N/A | N/A |
| **Residual Mass** | N/A | N/A | N/A | N/A | .931 | .02ᵃ | N/A | N/A |
| **Skin Mass** | .321 | -.33ᵇ | .497 | -.26ᵇ | .132 | .54ᵃ | N/A | N/A |

Note:  Superscripts denote: ᵃ Kendall's Tau-b; ᵇ Kendall's Tau-c. N/A (Not Applicable): Correlation could not be computed because at least one variable was constant within the subgroup.

### **Additional file 2. Relationship between nutritional adequacy and somatotype stratified by playing position and total sample.**

| **Nutritional Adequacy** | **Somatotype** | **Forwards (n=12)** | **Midfielders (n=11)** | **Defenders (n=16)** | **Goalkeepers (n=4)** | **Total (n=43)** | |
| --- | --- | --- | --- | --- | --- | --- | --- |
| ***p*** | ***p*** | ***p*** | ***p*** | ***p*** | **tau** |
| **Calories** | **Endomorphy** | 1.000 | .428 | .428 | .505 | .412 | NS |
| **Mesomorphy** | .140 | .165 | .696 | .505 | .288 | NS |
| **Proteins** | **Endomorphy** | .223 | .428 | .327 | .401 | .356 | NS |
| **Mesomorphy** | .117 | .165 | .568 | N/A | .210 | NS |
| **Carbohydrates** | **Endomorphy** | .329 | N/A | .202 | .248 | .189 | NS |
| **Mesomorphy** | .240 | N/A | .696 | .248 | .305 | NS |
| **Lipids** | **Endomorphy** | .530 | .110 | .202 | N/A | .225 | NS |
| **Mesomorphy** | .430 | .166 | .226 | N/A | .318 | NS |

Note: p<0.05 = Significance. NS: Non-Significant correlation (Tau Kendall’s close to 0, p>0.05). N/A: Correlation could not be computed due to constant variables within the subgroup.
